# Supplementary material for: Transcranial direct current stimulation suggests a causal role of the medial prefrontal cortex in learning social hierarchy
Source: PubMed Central journal article supplement (PMC10924847; doi:10.1038/s42003-024-05976-2), 2024-03-09
Supplement: 42003_2024_5976_MOESM1_ESM.pdf [file 42003_2024_5976_MOESM1_ESM.pdf]

1  
2  
3  
4  
5  
6  
7  
8  
9  
10  
11  
12  
13  
14  
15  
16  
17  
18  
19  
20  
21  
22  
23  
24  
25  
26  
27  
28  
29  
30  
31  
32  
33  
34  
35  
36  
37  
38  
39  
40  
41  
42

## Supplementary Information for

### **Transcranial Direct Current Stimulation Suggests a Causal Role of the Medial Prefrontal Cortex in Learning Social Hierarchy**

Chen Qu<sup>1\*</sup>, Yulong Huang<sup>1,2\*</sup>, Rémi Philippe<sup>3,4\*</sup>, Shenggang Cai<sup>5,6</sup>, Edmund Derrington<sup>3,4</sup>,  
Frédéric Moisan<sup>7</sup>, Mengke Shi<sup>1</sup>, and Jean-Claude Dreher<sup>3,4</sup>

<sup>1</sup> Center for Studies of Psychological Application, South China Normal University, Guangzhou, China

<sup>2</sup> Department of Experimental Psychology, Ghent University, Ghent, Belgium

<sup>3</sup> Laboratory of Neuroeconomics, Institut des Sciences Cognitives Marc Jeannerod, CNRS, Lyon, France

<sup>4</sup> Université Claude Bernard Lyon 1, Lyon, France

<sup>5</sup> School of Economics and Management, South China Normal University, Guangzhou, China

<sup>6</sup> Key Lab for Behavioral Economic Science & Technology, South China Normal University, Guangzhou, China

<sup>7</sup> GATE CNRS and EmLyon, Ecully, France

\* These authors contributed equally

Corresponding: Jean-Claude Dreher

Email: [dreher@isc.cnrs.fr](mailto:dreher@isc.cnrs.fr)

#### **This Supplementary Information includes:**

Supplementary Note 1

Supplementary Figure 1

Supplementary Table 1 to 6

43 **Supplementary Note 1**

44

45 **Supplementary analysis of the first block learning effect.**

46

47 To justify that the brain stimulation effect was not due to the initial learning value differences within  
48 the group, we performed an additional analysis of the first block of the training phase. Note that  
49 within each training block participant repeated the learning of adjacent items twice. Thus, the  
50 average accuracy of the first block already included the learning effect through trial and error. To  
51 address the question of whether there is a different initial value between groups, we conducted two  
52 analyses: 1) Repeated measure ANOVA with Hierarchy Type (Social, Non-social) x tDCS  
53 (Cathode, Sham, Anode) x Familiarity (First-time trials, Second-time trials) on the first block  
54 performance accuracy (%) and reaction time (ms); 2) One-sample Student t-test of performance  
55 accuracy of each condition to test of the average accuracy is significantly greater than 0.5 chance  
56 level.

57 As shown in Supplementary Fig.1 a-b, the results of accuracy showed only a significant main  
58 effect of familiarity between the first-time and second-time trials ( $F_{(1,125)} = 68.956$ ,  $p < 0.001$ ,  $\eta_p^2 =$   
59  $0.356$ ; First-time trials:  $M = 0.398$ ,  $SD = 0.196$ ; Second-time trials:  $M = 0.538$ ,  $SD = 0.204$ ),  
60 indicating the participants in all the groups performed better in the second-time trials compared to  
61 the first time, and thus there was a learning effect within the first block. However, there was no  
62 significant three-way interaction ( $F_{(2,125)} = 1.014$ ,  $p = 0.366$ ,  $\eta_p^2 = 0.016$ ) or two-way interaction  
63 between either hierarchy type and tDCS groups ( $F_{(2,125)} = 1.014$ ,  $p = 0.366$ ,  $\eta_p^2 = 0.016$ ), or  
64 Familiarity and tDCS groups ( $F_{(2,125)} = 2.606$ ,  $p = 0.078$ ,  $\eta_p^2 = 0.040$ ). These results indicate that for  
65 first-time and second-time trials, we did not observe differences between groups but only a general  
66 increased accuracy for the second-time trials within the first block. This provides evidence that  
67 there was no significant difference in the initial level of performance between the groups.

68 The analysis of reaction time showed similar results (see Supplementary Fig.1 c-d), i.e., within  
69 groups participants responded significantly slower during second-time trials compared to the first-  
70 time ( $F_{(1,125)} = 68.956$ ,  $p < 0.05$ ,  $\eta_p^2 = 0.046$ ; First-time trials:  $M = 1501.073$ ,  $SD = 356.07$ ; Second-  
71 time trials:  $M = 1545.291$ ,  $SD = 337.691$ ). They also responded faster in the non-social condition  
72 compared to the social hierarchy training ( $F_{(1,125)} = 15.978$ ,  $p < 0.001$ ,  $\eta_p^2 = 0.113$ ; Non-social:  $M =$   
73  $1471.743$ ,  $SD = 348.474$ ; Social:  $M = 1574.621$ ,  $SD = 339.199$ ). However, there was no significant  
74 three-way interaction ( $F_{(2,125)} = 0.589$ ,  $p = 0.556$ ,  $\eta_p^2 = 0.009$ ) or two-way interaction in either  
75 hierarchy type and tDCS groups ( $F_{(2,125)} = 0.089$ ,  $p = 0.915$ ,  $\eta_p^2 = 0.001$ ), or Familiarity and tDCS  
76 groups ( $F_{(2,125)} = 1.223$ ,  $p = 0.298$ ,  $\eta_p^2 = 0.019$ ). These results further confirm that at the beginning  
77 of the task, there was no group difference but only a general learning effect such that on the second-  
78 time trials, after the feedback from first-time trials, participants spent more time making a judgment  
79 and, compared to the non-social hierarchy, they took more time to make these judgments in the

80 social condition. Finally, a second one-sample student t-test (>0.5 chance level, see  
 81 Supplementary Table 1) showed that only the Anode groups had significantly higher chance levels  
 82 of accuracy on the second-time trials of the non-social hierarchy training. The other groups  
 83 (cathode and sham) and all groups for the social condition were not significantly better than the  
 84 chance level, indicating that participants were still at the initial phase of learning the hierarchies.

85

86 **Supplementary Figure 1: First block learning effect of the Training phase.**

87

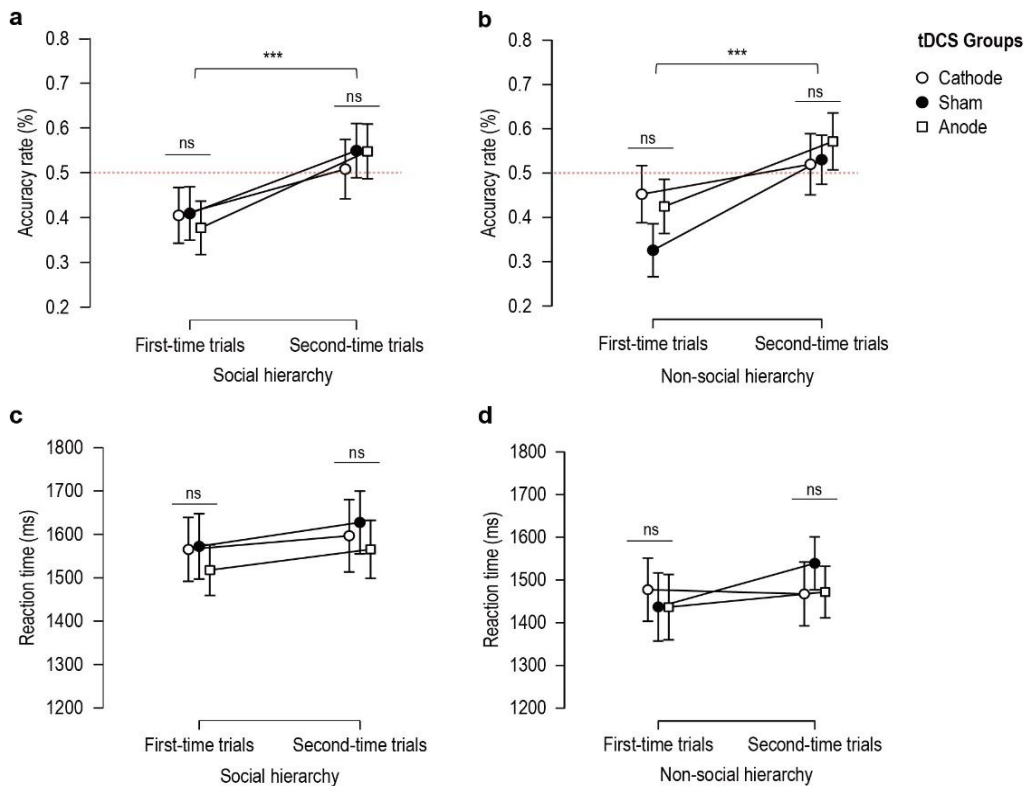

88 **a** Performance accuracy (%) of first block trials on Social Training Phase in different tDCS groups. **b**  
 89 Performance accuracy (%) of first block trials on Non-social Training Phase in different tDCS groups. **c**  
 90 Reaction time (ms) of first block trials on Social Training Phase in different tDCS groups. **d** Reaction time (ms)  
 91 of first block trials on Non-social Training Phase in different tDCS groups. The y-axis indicates the raw  
 92 performance data. (N=128: Cathode=42, Sham=44, Anode=42; \* indicates  $p < 0.05$ , \*\* indicates  $p < 0.005$ ,  
 93 \*\*\* indicates  $p < 0.001$ , ns indicates non-significant). Error bars indicate Confidence Intervals 95% CI.

95

96

97

98

99

100

101

102

103

104

105 **Supplementary Table 1**

| Hierarchy type | Familiarity | tDCS    | Mean  | SD    | t      | p      | Cohen's d | 95% CI for Cohen's d |       |
|----------------|-------------|---------|-------|-------|--------|--------|-----------|----------------------|-------|
|                |             |         |       |       |        |        |           | Lower                | Upper |
| Non-social     | First-time  | Anode   | 0.425 | 0.195 | -2.286 | 0.986  | -0.357    | -0.62                | ∞     |
|                |             | Cathode | 0.452 | 0.231 | -1.338 | 0.906  | -0.209    | -0.467               | ∞     |
|                |             | Sham    | 0.326 | 0.183 | -6.312 | 1      | -0.952    | -1.247               | ∞     |
|                | Second-time | Anode   | 0.571 | 0.202 | 2.293  | 0.014* | 0.358     | 0.091                | ∞     |
|                |             | Cathode | 0.52  | 0.233 | 0.666  | 0.255  | 0.104     | -0.154               | ∞     |
|                |             | Sham    | 0.53  | 0.184 | 1.091  | 0.141  | 0.164     | -0.086               | ∞     |
| Social         | First-time  | Anode   | 0.377 | 0.188 | -4.107 | 1      | -0.641    | -0.92                | ∞     |
|                |             | Cathode | 0.405 | 0.188 | -3.147 | 0.998  | -0.492    | -0.761               | ∞     |
|                |             | Sham    | 0.409 | 0.174 | -3.464 | 0.999  | -0.522    | -0.784               | ∞     |
|                | Second-time | Anode   | 0.548 | 0.206 | 1.379  | 0.088  | 0.215     | -0.046               | ∞     |
|                |             | Cathode | 0.508 | 0.198 | 0.26   | 0.398  | 0.041     | -0.217               | ∞     |
|                |             | Sham    | 0.549 | 0.205 | 1.592  | 0.059  | 0.24      | -0.013               | ∞     |

106 Note. For the Student t-test, the alternative hypothesis specifies that the mean is greater than 0.5. \*&lt;0.05

107

108

109

110

111

112 **Supplementary Table 2. Descriptive statistics of Demographic, Questionnaires, and Task-relevant**  
 113 **subjective rating**

|                                  |                 | <b>Anodal<br/>(N=42)</b>              | <b>Sham<br/>(N=44)</b>                | <b>Cathodal<br/>(N=42)</b>            |
|----------------------------------|-----------------|---------------------------------------|---------------------------------------|---------------------------------------|
| <b>Gender</b>                    |                 | Males=21<br>Females=21                | Males=22<br>Females=23                | Males=21<br>Females=21                |
| <b>Age</b>                       |                 | 19.610±0.231                          | 19.909±0.239                          | 20.171±0.281                          |
| <b>SDO</b>                       |                 | 51.190±13.515                         | 53.114±12.085                         | 51.595±10.378                         |
| <b>Truth Degree</b>              |                 | 5.452±0.350                           | 5.545±0.337                           | 5.976±0.352                           |
| <b>tDCS uncomfortable rating</b> |                 | 1.536±0.146                           | 1.341±0.101                           | 1.762±0.137                           |
| <b>Choice Bias</b>               | <b>Training</b> | Left=0.501±0.005<br>Right=0.499±0.005 | Left=0.504±0.005<br>Right=0.496±0.005 | Left=0.503±0.005<br>Right=0.497±0.005 |
|                                  | <b>Test</b>     | Left=0.502±0.003<br>Right=0.498±0.003 | Left=0.508±0.003<br>Right=0.492±0.003 | Left=0.499±0.003<br>Right=0.501±0.003 |

114

Note: One-way ANOVA showed no significant differences of the above measurements among groups.

115

116

117

118

119 **Supplementary Table 3. tDCS effect of block-to-block hierarchy learning in the performance % of**120 **Social condition**

| <b>Block</b> | <b>Anode vs Sham</b> |          |               |          | <b>Cathode vs Sham</b> |          |               |          |
|--------------|----------------------|----------|---------------|----------|------------------------|----------|---------------|----------|
|              | <b>Training</b>      |          | <b>Test</b>   |          | <b>Training</b>        |          | <b>Test</b>   |          |
|              | <b>b(SE)</b>         | <b>P</b> | <b>b(SE)</b>  | <b>P</b> | <b>b(SE)</b>           | <b>P</b> | <b>b(SE)</b>  | <b>P</b> |
| <b>1</b>     | -0.053(0.026)        | 0.044*   | -0.113(0.036) | 0.002**  | 0.002(0.026)           | 0.925    | 0.037(0.036)  | 0.305    |
| <b>2</b>     | -0.055(0.025)        | 0.028*   | -0.103(0.035) | 0.004**  | 0.009(0.025)           | 0.728    | 0.026(0.035)  | 0.451    |
| <b>3</b>     | -0.055(0.024)        | 0.020*   | -0.090(0.035) | 0.009**  | 0.014(0.023)           | 0.554    | 0.016(0.033)  | 0.624    |
| <b>4</b>     | -0.055(0.023)        | 0.016*   | -0.076(0.033) | 0.022*   | 0.018(0.022)           | 0.418    | 0.008(0.032)  | 0.803    |
| <b>5</b>     | -0.053(0.022)        | 0.014*   | -0.063(0.031) | 0.045*   | 0.021(0.021)           | 0.320    | 0.001(0.030)  | 0.971    |
| <b>6</b>     | -0.050(0.021)        | 0.015*   | -0.051(0.029) | 0.082    | 0.022(0.019)           | 0.254    | -0.004(0.028) | 0.882    |
| <b>7</b>     | -0.046(0.019)        | 0.016*   | -0.040(0.026) | 0.133    | 0.023(0.018)           | 0.209    | -0.008(0.025) | 0.761    |
| <b>8</b>     | -0.042(0.018)        | 0.019*   | -0.030(0.023) | 0.197    | 0.022(0.016)           | 0.180    | -0.010(0.023) | 0.662    |
| <b>9</b>     | -0.038(0.017)        | 0.022*   | -0.023(0.021) | 0.268    | 0.021(0.015)           | 0.160    | -0.011(0.021) | 0.583    |
| <b>10</b>    | -0.033(0.015)        | 0.027*   | -0.017(0.018) | 0.344    | 0.019(0.013)           | 0.146    | -0.012(0.018) | 0.520    |
| <b>11</b>    | -0.029(0.014)        | 0.032*   | -0.012(0.015) | 0.420    | 0.017(0.012)           | 0.136    | -0.011(0.016) | 0.470    |
| <b>12</b>    | -0.025(0.012)        | 0.038*   | -0.009(0.013) | 0.495    | 0.016(0.010)           | 0.129    | -0.011(0.014) | 0.429    |

Significance: \* $p < 0.05$ , \*\* $p < 0.01$ , \*\*\* $p < 0.001$ .

121

122

123

124

125

126 **Supplementary Table 4. tDCS effect of block-to-block hierarchy learning in the reaction time of Social**  
 127 **condition**

| Block | Anode vs Sham   |       |                 |               | Cathode vs Sham |       |                |       |
|-------|-----------------|-------|-----------------|---------------|-----------------|-------|----------------|-------|
|       | Training        |       | Test            |               | Training        |       | Test           |       |
|       | b(SE)           | P     | b(SE)           | P             | b(SE)           | P     | b(SE)          | P     |
| 1     | -32.440(37.704) | 0.390 | 35.783(41.108)  | 0.384         | -27.055(37.704) | 0.473 | 2.289(41.108)  | 0.956 |
| 2     | -22.860(37.052) | 0.537 | 45.753(40.126)  | 0.254         | -26.770(37.052) | 0.470 | 3.080(40.126)  | 0.939 |
| 3     | -13.280(36.522) | 0.716 | 55.723(39.323)  | 0.156         | -26.485(36.522) | 0.468 | 3.871(39.323)  | 0.922 |
| 4     | -3.7008(36.120) | 0.918 | 65.693(38.710)  | 0.090         | -26.200(36.120) | 0.468 | 4.663(38.710)  | 0.904 |
| 5     | 5.879(35.849)   | 0.870 | 75.663(38.296)  | 0.048*        | -25.915(35.849) | 0.470 | 5.454(38.296)  | 0.887 |
| 6     | 15.459(35.713)  | 0.665 | 85.633(38.087)  | 0.025*        | -25.630(35.713) | 0.473 | 6.245(38.087)  | 0.870 |
| 7     | 25.038(35.713)  | 0.483 | 95.604(38.087)  | 0.012*        | -25.345(35.713) | 0.478 | 7.037(38.087)  | 0.853 |
| 8     | 34.618(35.849)  | 0.334 | 105.574(38.296) | 0.006**       | -25.060(35.849) | 0.485 | 7.828(38.296)  | 0.838 |
| 9     | 44.198(36.120)  | 0.221 | 115.544(38.710) | 0.003**       | -24.775(36.120) | 0.493 | 8.619(38.710)  | 0.824 |
| 10    | 53.777(36.522)  | 0.141 | 125.514(39.323) | 0.001**       | -24.491(36.522) | 0.502 | 9.411(39.323)  | 0.811 |
| 11    | 63.357(37.052)  | 0.087 | 135.484(40.126) | 0.001**       | -24.206(37.052) | 0.514 | 10.202(40.126) | 0.799 |
| 12    | 72.937(37.704)  | 0.053 | 145.454(41.108) | <.0001<br>*** | -23.921(37.704) | 0.526 | 10.993(41.108) | 0.789 |

128 Significance: \* $p < 0.05$ , \*\* $p < 0.01$ , \*\*\* $p < 0.001$ .

129

130

131

132

133 **Supplementary Table 5. tDCS effect of block-to-block hierarchy learning in the % performance of Non-**  
 134 **Social condition**

| Block | Anode vs Sham |       |               |       | Cathode vs Sham |        |               |        |
|-------|---------------|-------|---------------|-------|-----------------|--------|---------------|--------|
|       | Training      |       | Test          |       | Training        |        | Test          |        |
|       | b(SE)         | P     | b(SE)         | P     | b(SE)           | P      | b(SE)         | P      |
| 1     | 0.007(0.026)  | 0.788 | -0.053(0.036) | 0.142 | 0.022(0.026)    | 0.403  | -0.004(0.037) | 0.907  |
| 2     | 0.005(0.025)  | 0.828 | -0.045(0.035) | 0.197 | 0.010(0.025)    | 0.682  | -0.017(0.036) | 0.639  |
| 3     | 0.004(0.024)  | 0.873 | -0.037(0.034) | 0.272 | -0.001(0.024)   | 0.969  | -0.027(0.034) | 0.422  |
| 4     | 0.002(0.023)  | 0.920 | -0.029(0.032) | 0.364 | -0.011(0.023)   | 0.631  | -0.036(0.033) | 0.268  |
| 5     | 0.001(0.022)  | 0.966 | -0.022(0.031) | 0.468 | -0.019(0.022)   | 0.371  | -0.043(0.031) | 0.168  |
| 6     | 0.000(0.021)  | 0.992 | -0.016(0.029) | 0.575 | -0.026(0.021)   | 0.207  | -0.048(0.030) | 0.107  |
| 7     | -0.001(0.019) | 0.955 | -0.011(0.026) | 0.680 | -0.031(0.020)   | 0.115  | -0.050(0.028) | 0.071  |
| 8     | -0.002(0.018) | 0.923 | -0.007(0.024) | 0.778 | -0.034(0.018)   | 0.066  | -0.052(0.026) | 0.049* |
| 9     | -0.002(0.016) | 0.896 | -0.004(0.022) | 0.867 | -0.035(0.017)   | 0.040* | -0.052(0.025) | 0.035* |
| 10    | -0.002(0.015) | 0.873 | -0.001(0.02)  | 0.947 | -0.035(0.016)   | 0.026* | -0.051(0.023) | 0.027* |
| 11    | -0.002(0.013) | 0.854 | 0.000(0.017)  | 0.983 | -0.035(0.015)   | 0.018* | -0.049(0.021) | 0.021* |
| 12    | -0.002(0.012) | 0.838 | 0.002(0.015)  | 0.921 | -0.033(0.013)   | 0.013* | -0.046(0.020) | 0.018* |

135

136

137

Significance: \* $p < 0.05$ , \*\* $p < 0.01$ , \*\*\* $p < 0.001$ .



138 **Supplementary Table 6. tDCS effect of block-to-block hierarchy learning in the reaction time of Non-**  
 139 **Social condition**

| <i>Block</i> | <i>Anode vs Sham</i> |          |                 |          | <i>Cathode vs Sham</i> |          |                 |          |
|--------------|----------------------|----------|-----------------|----------|------------------------|----------|-----------------|----------|
|              | <i>Training</i>      |          | <i>Test</i>     |          | <i>Training</i>        |          | <i>Test</i>     |          |
|              | <i>b(SE)</i>         | <i>P</i> | <i>b(SE)</i>    | <i>P</i> | <i>b(SE)</i>           | <i>P</i> | <i>b(SE)</i>    | <i>P</i> |
| 1            | -79.414(37.704)      | 0.035*   | -87.487(41.108) | 0.033*   | -62.531(37.704)        | 0.097    | -93.396(41.108) | 0.023*   |
| 2            | -71.176(37.052)      | 0.055    | -73.214(40.126) | 0.068    | -53.684(37.052)        | 0.147    | -74.721(40.126) | 0.063    |
| 3            | -62.937(36.522)      | 0.085    | -58.940(39.323) | 0.134    | -44.837(36.522)        | 0.220    | -56.046(39.323) | 0.154    |
| 4            | -54.698(36.120)      | 0.130    | -44.667(38.710) | 0.249    | -35.990(36.120)        | 0.319    | -37.371(38.710) | 0.334    |
| 5            | -46.460(35.849)      | 0.195    | -30.394(38.296) | 0.427    | -27.143(35.849)        | 0.449    | -18.695(38.296) | 0.625    |
| 6            | -38.221(35.713)      | 0.285    | -16.121(38.087) | 0.672    | -18.296(35.713)        | 0.608    | -0.020(38.087)  | 1.000    |
| 7            | -29.982(35.713)      | 0.401    | -1.847(38.087)  | 0.961    | -9.449(35.713)         | 0.791    | 18.655(38.087)  | 0.624    |
| 8            | -21.744(35.849)      | 0.544    | 12.426(38.296)  | 0.746    | -0.602(35.849)         | 0.987    | 37.330(38.296)  | 0.330    |
| 9            | -13.505(36.120)      | 0.708    | 26.699(38.710)  | 0.490    | 8.245(36.120)          | 0.819    | 56.005(38.71)   | 0.148    |
| 10           | -5.267(36.522)       | 0.885    | 40.972(39.323)  | 0.297    | 17.092(36.522)         | 0.640    | 74.680(39.323)  | 0.058    |
| 11           | 2.972(37.052)        | 0.936    | 55.246(40.126)  | 0.169    | 25.938(37.052)         | 0.484    | 93.355(40.126)  | 0.020*   |
| 12           | 11.211(37.704)       | 0.766    | 69.519(41.108)  | 0.091    | 34.785(37.704)         | 0.356    | 112.03(41.108)  | 0.006**  |

Significance: \* $p < 0.05$ , \*\* $p < 0.01$ , \*\*\* $p < 0.001$ .

140  
 141  
 142
