# Supplementary material for: Transcranial direct current stimulation suggests a causal role of the medial prefrontal cortex in learning social hierarchy
Source: PubMed Central journal article supplement (PMC10924847; doi:10.1038/s42003-024-05976-2), 2024-03-09
Supplement: 42003_2024_5976_MOESM2_ESM.pdf [file 42003_2024_5976_MOESM2_ESM.pdf]

## Description of Additional Supplementary Files

**File name:** Supplementary Data 1

**Description:** The source data behind the figures in the manuscript.
